# Supplementary material for: The microRNA-200 family coordinately regulates cell adhesion and proliferation in hair morphogenesis
Source: PubMed Central journal article supplement — J Cell Biol. 2018 Jun 4;217(6):2185–204. doi: 10.1083/jcb.201708173 (PMC5987720; doi:10.1083/jcb.201708173), 2018-06-04
Supplement: JCB_201708173_sm.pdf [file JCB_201708173_sm.pdf]

## Supplemental material

Hoefert et al., <https://doi.org/10.1083/jcb.201708173>

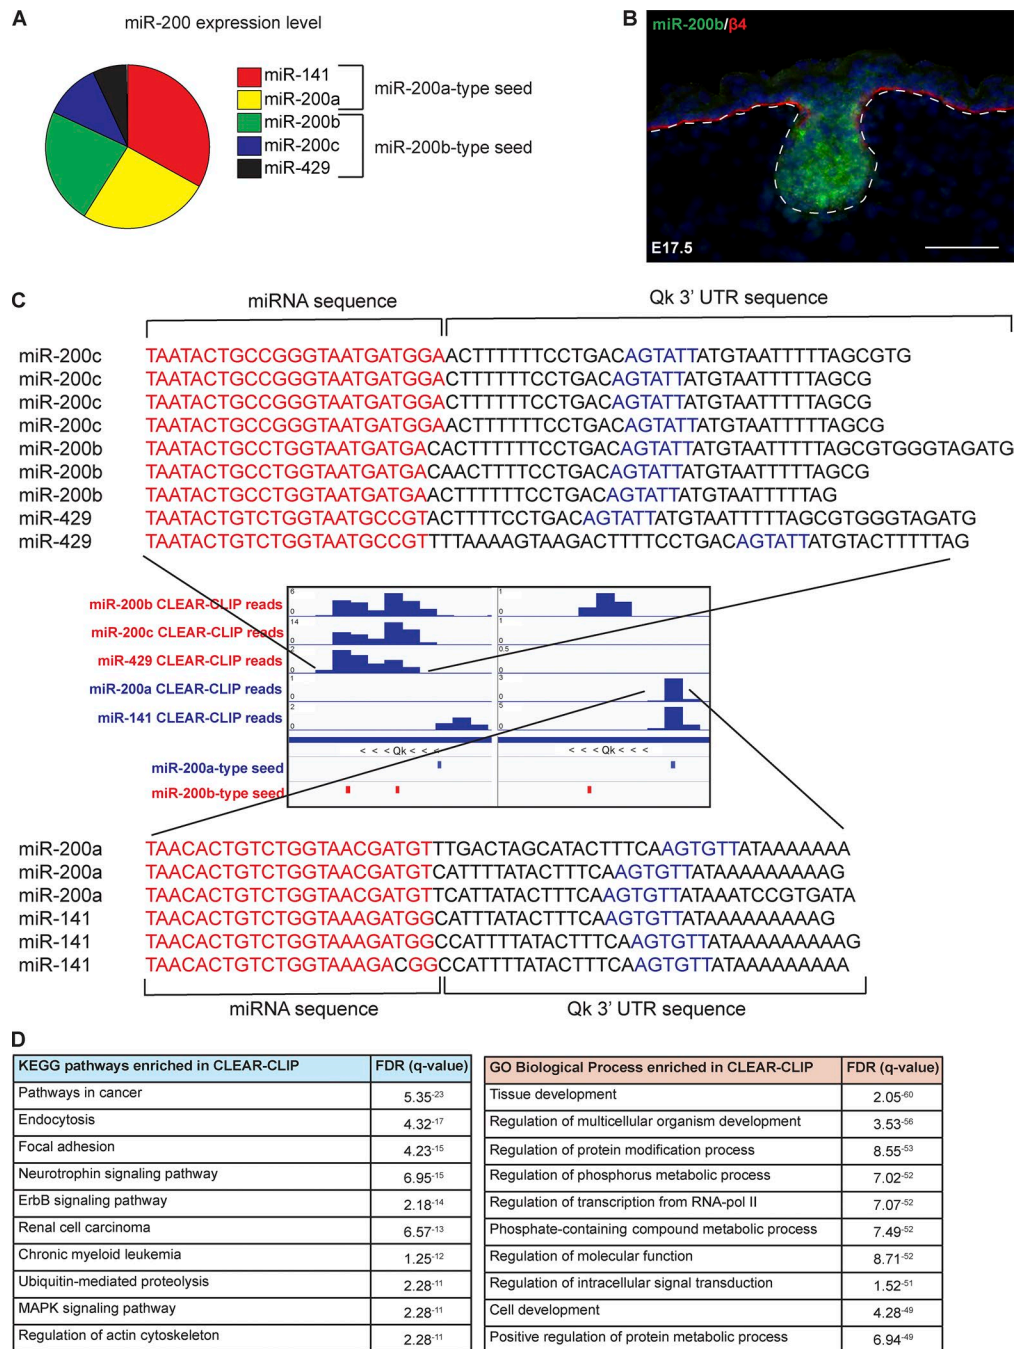

Figure S1. **miR-200 family expression pattern, representative CLEAR-CLIP reads, and target enrichment.** (A) Proportion of miR-200 family reads from each family member in miRNA-seq from Fig. 1 A. (B) In situ hybridization with a probe against miR-200b at E17.5. Bar, 50  $\mu$ m. (C) Sequences of individual reads recovered from regions of the Qk 3' UTR. miRNA sequence is shown in red, and seed sequence shown in blue. (D) GO-terms enriched within miR-200 targets identified with CLEAR-CLIP. Analysis was performed with the Molecular Signatures Database (MSigDb; Broad Institute). FDR, false discovery rate.

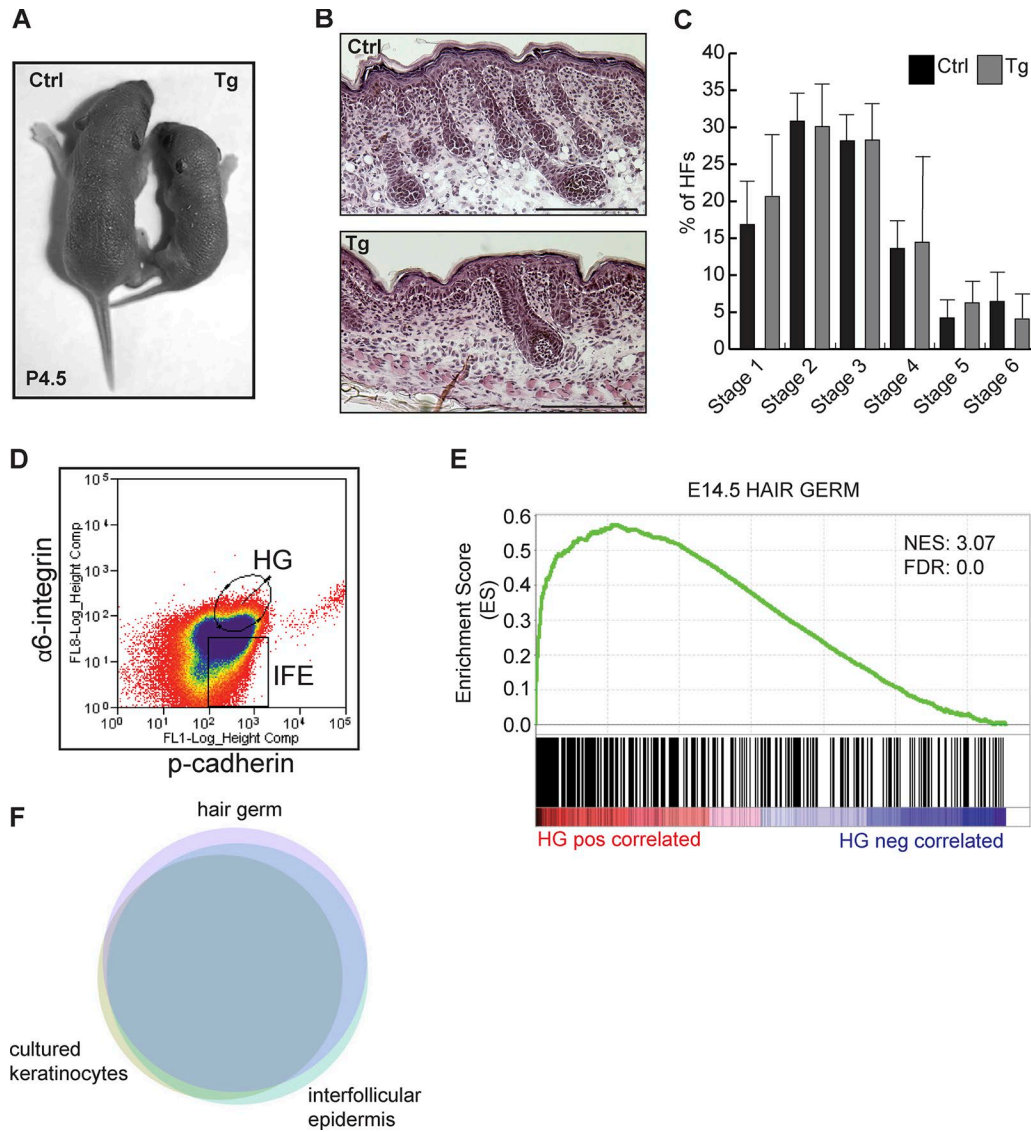

Figure S2. **Effect of miR-200 family expression on body size and hair follicles and validation of HG sorting.** **(A)** Control and Tg littermates at P4.5. **(B)** H&E staining on back skin from control and Tg animals at P0.5. Bars, 100  $\mu$ m. **(C)** Percentage of hair follicles (HFs) at each stage of development in control and Tg animals at P0.5.  $n = 3$ . Error bars represent SD. **(D)** Sorting strategy used to isolate HG and IFE populations. **(E)** GSEA comparing HG population with a previously published E14.5 HG microarray signature (Rhee et al., 2006). FDR, false discovery rate; NES, normalized enrichment score. **(F)** Venn diagram comparing transcriptomes from cultured keratinocytes, HGs, and IFE.

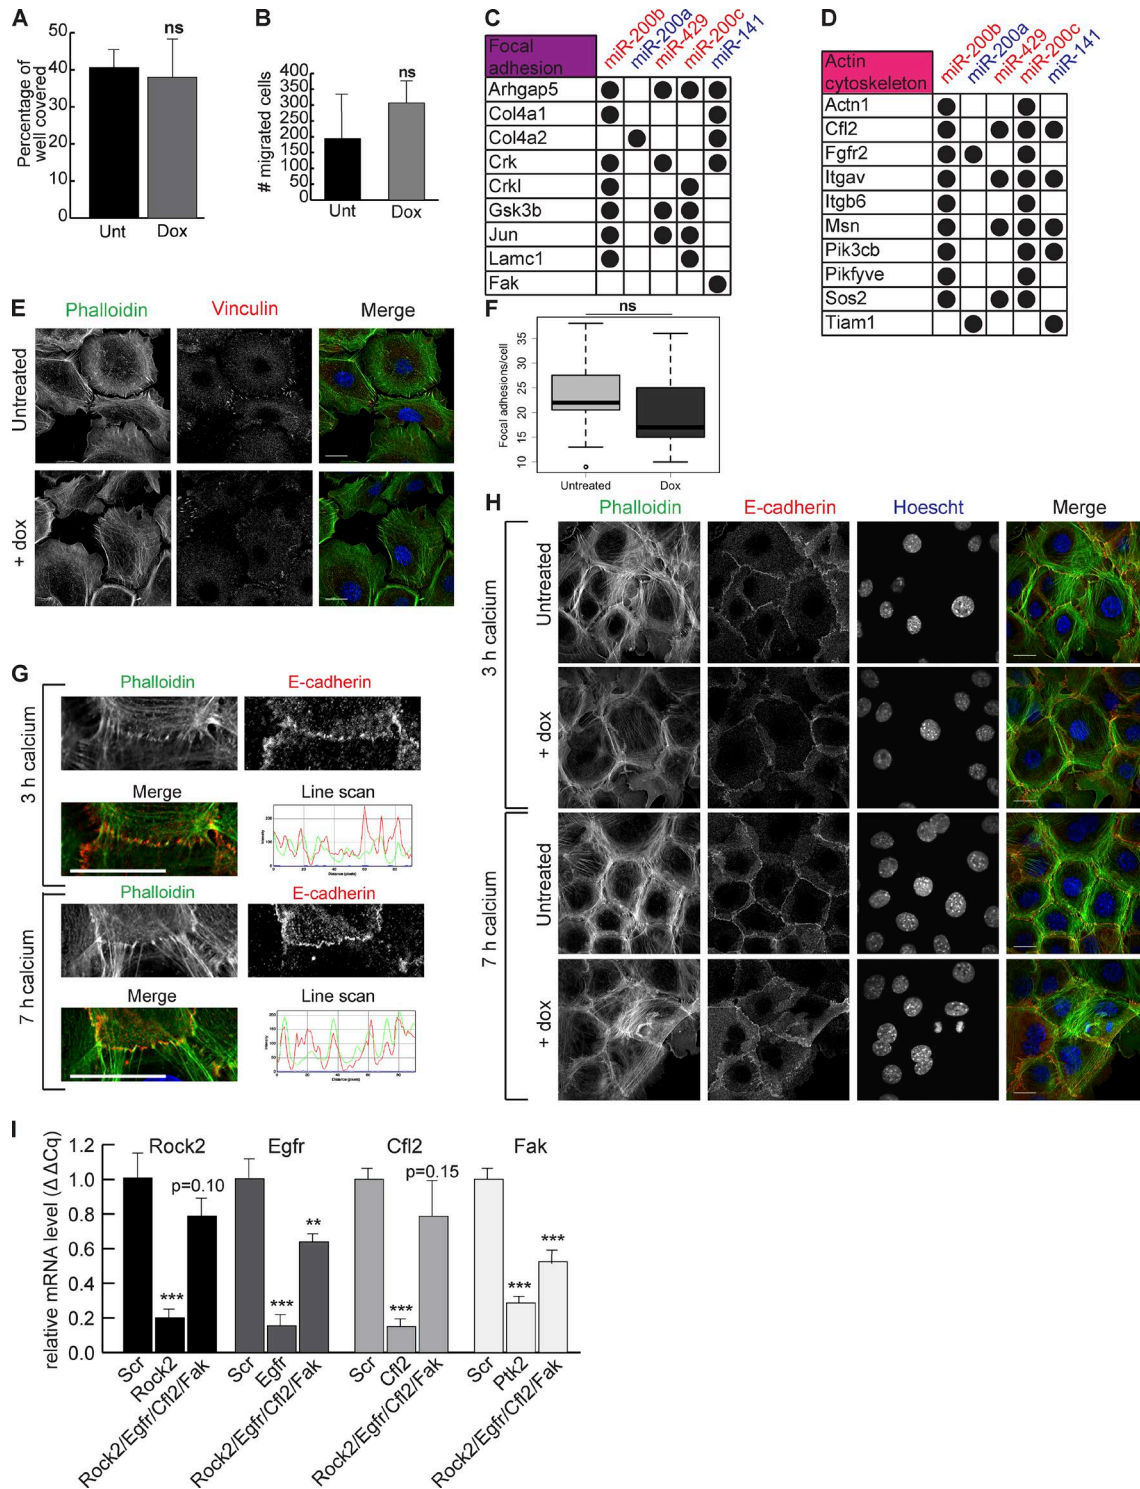

**Figure S3. miR-200s regulate proliferation, migration, FA, and cell junction formation.** (A) Percentage of wells covered by colonies formed by WT keratinocytes untreated (Unt) or treated with doxycycline (Dox).  $n = 3$ . (B) Number of cells migrated after 8 h in a scratch assay performed on WT keratinocytes untreated or treated with doxycycline.  $n = 3$ . (C) Extended list of miR-200 family targets identified with CLEAR-CLIP and RNA-seq involved in FA. (D) Extended list of miR-200 family targets identified with CLEAR-CLIP and RNA-seq involved in actin cytoskeleton. (E) Immunofluorescence of vinculin (red) and Phalloidin stain for actin (green) on WT keratinocytes untreated or treated with doxycycline. (F) Number of FAs per cell in E.  $n = 20$  untreated and  $n = 20$  doxycycline-treated cells. (G) Immunofluorescence of E-cadherin (red) and phalloidin staining for actin (green) on WT keratinocytes untreated or treated with doxycycline. Cells were treated with calcium for 3 or 7 h. RGB line scans were performed on 90 pixels across the length of each cell junction. Representative image from  $n > 20$  junctions imaged for each condition. (H) Immunofluorescence of E-cadherin (red) and phalloidin staining for actin (green) on inducible keratinocytes untreated or treated with doxycycline and induced with calcium for 3 or 7 h. Representative images from  $n > 20$  cell junctions imaged for each treatment. Full-sized images of selections are shown in Fig. 4 I. Bars, 20  $\mu\text{m}$ . (I) Quantitative RT-PCR on WT keratinocytes infected with shRNAs.  $n = 3$ . \*\*,  $P < 0.01$ ; \*\*\*,  $P < 0.001$ ; error bars show SD.



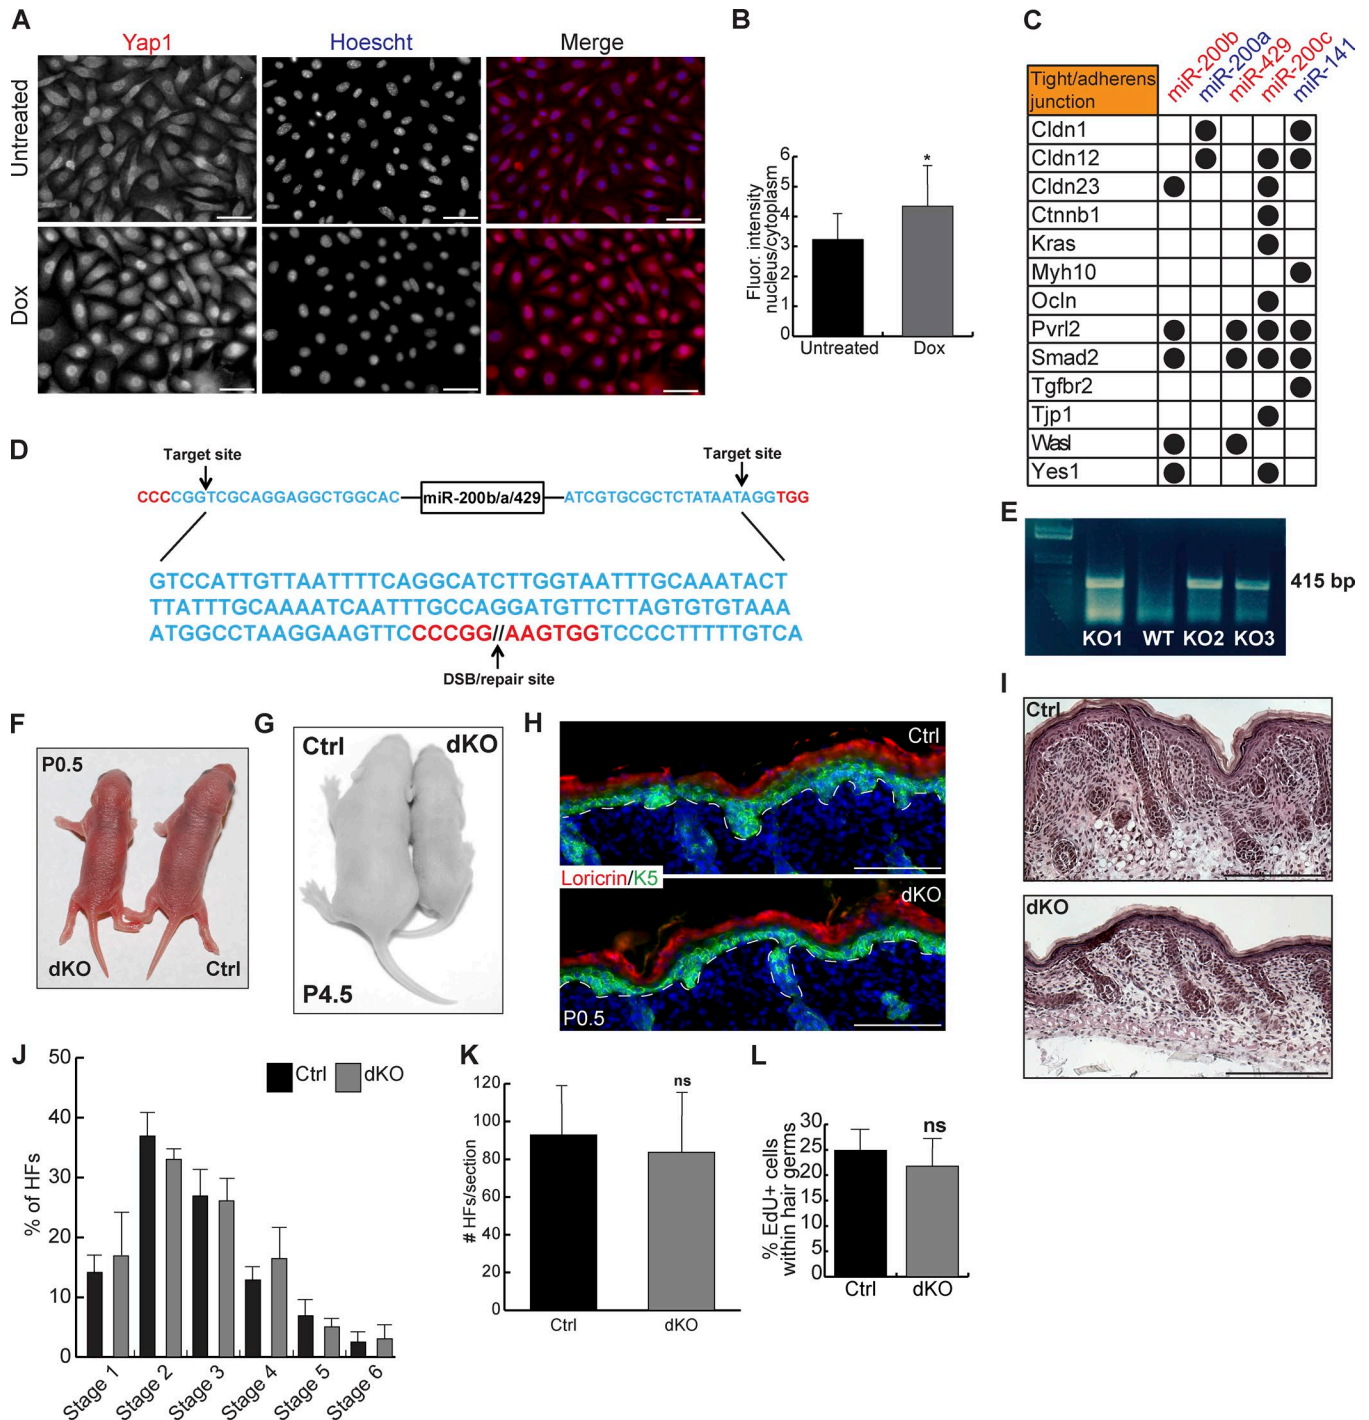

Figure S4. **Generation of a mouse model lacking miR-200s and the effect of the loss on body size and hair follicles.** (A) Immunofluorescence of Yap1 on inducible keratinocytes untreated or treated with doxycycline (Dox). (B) Fluorescence intensity of nucleus compared with cytoplasm from cells in A.  $n = 3$ . (C) Extended list of miR-200 family targets identified with CLEAR-CLIP and RNA-seq involved in tight junctions and AJs. (D) Sequencing result from one of the miR-200b cluster KO founder mice generated through CRISPR. Top arrows indicate expected cut sites, and the bottom arrow shows the repaired sequence. DSB, double-strand break. (E) Genotyping band showing null allele in a miR-200b KO mouse. (F) Control and miR-200 dKO littermates at P0.5. (G) Control and miR-200 dKO littermates at P4.5. (H) Immunofluorescence for loricrin (red) and keratin-5 (green) in back skin of control and dKO animals at P0.5. Representative images from  $n = 3$  pairs of animals. (I) H&E staining on back skin from control and dKO animals at P0.5. Bars: (A) 50  $\mu\text{m}$ ; (H and I) 100  $\mu\text{m}$ . (J) Percentage of hair follicles (HF) at each stage of development in control and Tg animals at P0.5.  $n = 3$ . (K) Number of hair follicles per section in control and dKO back skin at P0.5.  $n = 3$ . (L) Percentage of EdU<sup>+</sup> cells in HGs of control and dKO animals at P0.5.  $n = 4$ . Error bars represent SD.

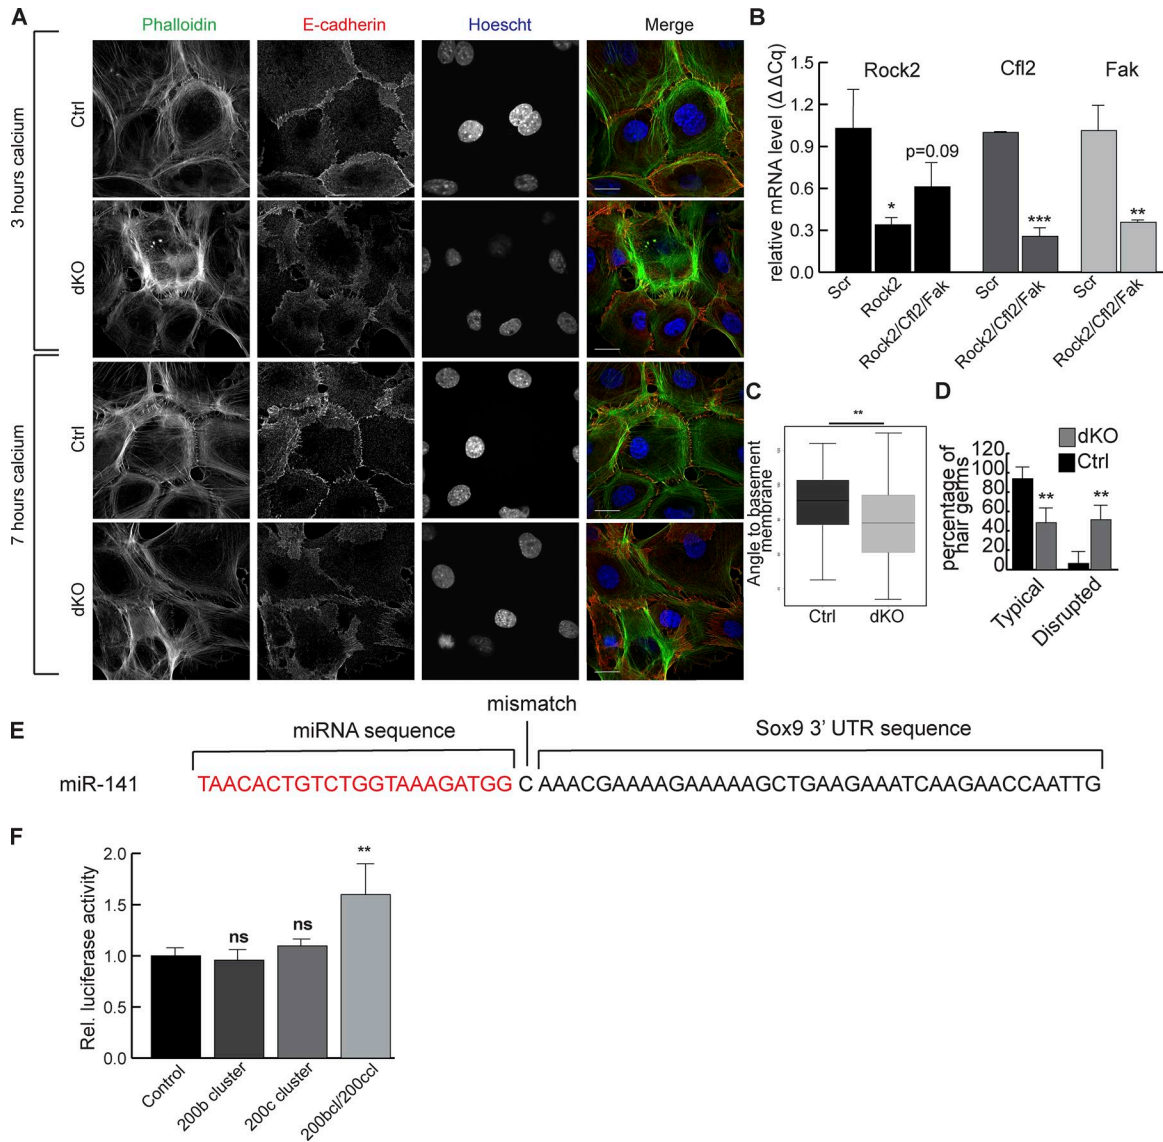

Figure S5. **Loss of miR-200s affects cell junction formation and cell orientation, and miR-200s do not directly regulate Sox9.** (A) Immunofluorescence of E-cadherin (red) and phalloidin staining for actin (green) on control and dKO keratinocytes induced with calcium for 3 or 7 h. Representative images from  $n > 20$  cell junctions imaged for each treatment. Full-sized images of selections are shown in Fig. 8 N. Bars, 20  $\mu$ m. (B) Quantitative RT-PCR on dKO keratinocytes infected with shRNAs.  $n = 3$ . (C) Angle of HG cells relative to the basement membrane from control and dKO animals at P0.5.  $n = 4$  pairs of animals,  $n = 16$  control cells, and  $n = 30$  dKO cells. (D) Percentage of HGs from control and dKO animals at P0.5 with typical or disrupted cell polarity as imaged with pericentrin in Fig. 10 E.  $n = 4$ . (E) A CLEAR-CLIP read for miR-141 ligated to the 3' UTR of Sox9. (F) Relative luciferase activity of Sox9 3' UTR with the addition of the miR-200b cluster, the miR-200c cluster, or both.  $n = 6$ . \*,  $P < 0.05$ ; \*\*,  $P < 0.01$ ; \*\*\*,  $P < 0.001$ ; error bars represent SD.

Table S1. **Primers used in this study**

| <b>Oligonucleotide</b>                                                     | <b>Sequence (5'-3')</b>                                  |
|----------------------------------------------------------------------------|----------------------------------------------------------|
| CRISPR; L gRNA for miR-200b cluster                                        | GTCCAGCCTCCTGCGACCG                                      |
| CRISPR; R gRNA for miR-200b cluster                                        | ATCGTGCGCTCTATAATAGG                                     |
| cloning; 200b luciferase reporter; forward                                 | CTAGATCATCATTACCAGGCAGTATTAGATCTCATCATTACCAGGCAGTATTAC   |
| cloning; 200b luciferase reporter; reverse                                 | TCGAGTAATACTGCCTGGTAATGATGAGATCTAATACTGCCTGGTAATGATGAT   |
| cloning; 141 luciferase reporter; forward                                  | CTAGACCATCTTTACCAGACAGTGTAGATCCCATCTTTACCAGACAGTGTAC     |
| cloning; 141 luciferase reporter; reverse                                  | TCGAGTAACACTGTCTGGTAAAGATGGGATCTAACACTGTCTGGTAAAGATGGT   |
| cloning; 200c luciferase reporter; forward                                 | CTAGATCCATCATTACCCGGCAGTATTAGATCTCCATCATTACCCGGCAGTATTAC |
| cloning; 200c luciferase reporter; reverse                                 | TCGAGTAATACTGCCGGTAAATGATGGAGATCTAATACTGCCGGTAAATGATGGAT |
| cloning; miR-200b cluster; forward                                         | GTTGACCTCTCCAACCTA                                       |
| cloning; miR-200b cluster; reverse                                         | ACCAGTGTGATAGCACAGG                                      |
| cloning; cyclin G2 3' UTR; forward                                         | CACAGACTGGAATACCTACCTTC                                  |
| cloning; cyclin G2 3' UTR; reverse                                         | GCACTGACCAATTATCACACA                                    |
| cloning; Ptpn14 3' UTR; forward                                            | GTCCCTCAGTACCAGAAGAAATG                                  |
| cloning; Ptpn14 3' UTR; reverse                                            | GAGGGAACAGTGC AAAGGAATA                                  |
| cloning; Ywhab 3' UTR; reverse                                             | GCTCAGACTGGTCCCTTAATAC                                   |
| cloning; Ywhab 3' UTR; reverse                                             | CCACCACAGAAGCAAACATTAG                                   |
| cloning; Snai2 3' UTR; forward                                             | TGGCGCAACCAGTGTTTA                                       |
| cloning; Snai2 3' UTR; reverse                                             | GTGGCTATTAACCGTACCTCAC                                   |
| cloning; Cfl2 3' UTR; forward                                              | CCCCTTCGTGAATGAGTGAATA                                   |
| cloning; Cfl2 3' UTR; reverse                                              | TGTGAGGGTAGGGAGTTTGA                                     |
| cloning; Ccnd2 3' UTR; forward                                             | CGTTTGGTCCGTTTGGTTC                                      |
| cloning; Ccnd2 3' UTR; reverse                                             | GTCTTAGCCTGTTGCTCCTATAA                                  |
| cloning; Lats1 3' UTR; reverse                                             | TATGAACTGAGTATTATAGTCAAT                                 |
| cloning; Lats1 3' UTR; reverse                                             | TGAACAAAATACTAAAATTGCAGA                                 |
| cloning; Lats2 3' UTR; reverse                                             | TGCATTA AACAGTATTTTTAAAA                                 |
| cloning; Lats2 3' UTR; reverse                                             | TAGCGAGAATACTGTAAGTCACAA                                 |
| cloning; Fat1 3' UTR; reverse                                              | CCATTTCCAGCGTCTAACT                                      |
| cloning; Fat1 3' UTR; reverse                                              | CCTTTACAAGACCATTGCATCAC                                  |
| cloning; Fat2 3' UTR; reverse                                              | GGGTGAGAACTAGGAGGTAAT                                    |
| cloning; Fat2 3' UTR; reverse                                              | CAAAGCCACTTGTGCAATC                                      |
| genotyping; pTRE2-200bcl; forward                                          | ATGCTGCCAGTAAGATGGC                                      |
| genotyping; pTRE2-200bcl; reverse                                          | CCTACAGCTCCTGGGCAACGTG                                   |
| genotyping; K14 forward primer for K14rtTA and K14cre                      | TGGCGGGTGCCGAGAT                                         |
| genotyping; K14rtTA; reverse                                               | TGCTGTTTCACTGGTTATGCGG                                   |
| genotyping; cre; reverse                                                   | TTGCCCTGTTTCACTATCCAG                                    |
| genotyping; miR-200c cluster floxed allele; forward                        | CAACAGCCTCTGACCTTTAACCC                                  |
| genotyping; miR-200c cluster floxed allele; reverse                        | CCTTCTGGGACAGACAAGAATAC                                  |
| genotyping; miR-200bcl CRISPR KO, left side; forward; forward for KO band  | GCTGAGCATCCGAAAAGTA                                      |
| genotyping; miR-200bcl CRISPR KO, left side; reverse                       | CAGGCTACCTCTTAGTGGCTGT                                   |
| genotyping; miR-200bcl CRISPR KO, right side; forward                      | ATGGGGAGTTTGAGTGTTC                                      |
| genotyping; miR-200bcl CRISPR KO, right side; reverse; reverse for KO band | TGCAAGGCTGCTTGTTAATG                                     |
| qPCR; Cyr61; forward                                                       | CCCCCGCTGGTGAAAGT                                        |
| qPCR; Cyr61; reverse                                                       | GCGGTTCCGTGCCAAAGA                                       |

Table S1. **Primers used in this study (Continued)**

| <b>Oligonucleotide</b>                   | <b>Sequence (5'-3')</b>        |
|------------------------------------------|--------------------------------|
| qPCR; Ctgf; forward                      | GGGCCTCTTCTGCGATTTTC           |
| qPCR; Ctgf; reverse                      | ATCCAGGCAAGTGCATTGGTA          |
| qPCR; Lats2; forward                     | GGACCCCAGGAATGAGCAG            |
| qPCR; Lats2; reverse                     | CCCTCGTAGTTTGCACCACC           |
| qPCR; Cfl2; forward                      | GCATCTGGAGTTACAGTGAATGA        |
| qPCR; Cfl2; reverse                      | CACCAATGTCACCCACCAAGA          |
| qPCR; Cyclin E2; forward                 | ATGTAAGACGCAGCCGTTTA           |
| qPCR; Cyclin E2; reverse                 | GCTGATTCCTCCAGACAGTACA         |
| qPCR; Celsr1; forward                    | TCGCTGACTTCGGTGCTTG            |
| qPCR; Celsr1; reverse                    | TTACCAGCTCTACCCAAACGG          |
| qPCR; Met; forward                       | GTGAACATGAAGTATCAGTCCC         |
| qPCR; Met; reverse                       | TGTAGTTTGTGGCTCCGAGAT          |
| qPCR; Egfr; forward                      | GCCATCTGGCCAAAGATACC           |
| qPCR; Egfr; reverse                      | GTCTTCGCATGAATAGGCCAAT         |
| qPCR; Ptk2/Fak; forward                  | TTAGGCGATCCTATTGGGAGATG        |
| qPCR; Ptk2/Fak; reverse                  | TTCTTAGTGTTTTGGCCTTGACA        |
| qPCR; Rock2; forward                     | TTGGTTCGTCATAAGGCATCAC         |
| qPCR; Rock2; reverse                     | TGTTGGCAAAGGCCATAATATCT        |
| CLEAR-CLIP; 3' linker                    | NNTGGAATTCTCGGGTGCCAAGG        |
| CLEAR-CLIP; 5' Linker                    | GUUCAGAGUUCUACAGUCCGACGAUCNNNN |
| CLEAR-CLIP; RT primer                    | GCCTGGCACCCGAGAATTCCA          |
| CLEAR-CLIP; library first round F primer | GTTCTACAGTCCGACGAT             |

## Reference

Rhee, H., L. Polak, and E. Fuchs. 2006. Lhx2 maintains stem cell character in hair follicles. *Science*. 312:1946–1949. <https://doi.org/10.1126/science.1128004>
